# Supplementary material for: Phosphate additive modification of C–S–H and C–A–S–H crystallization pathways
Source: Royal Society of Chemistry journal article supplement (doi:10.1039/d5ma00758e), 2025-01-01
Supplement: d5ma00758e1.pdf [file d5ma00758e1.pdf]

# Supplementary Information

## Phosphate Additive Modification of C-S-H and C-A-S-H Crystallization Pathways

Yannick H. Emminger<sup>a</sup>, Annika Bastian<sup>a</sup>, Luca Ladner<sup>a</sup>, Tobias Steiner<sup>a</sup>, Cristina Ruiz-Agudo<sup>a\*</sup>

<sup>a</sup>Physical Chemistry, University of Konstanz, Universitätsstrasse 10, 78457 Konstanz, Germany

\*Corresponding Author: Dr. Cristina Ruiz-Agudo (Email: [cristina.ruiz-agudo@uni-konstanz.de](mailto:cristina.ruiz-agudo@uni-konstanz.de))

**Keywords:** Cement hydrates, C-S-H, C-A-S-H, Non-classical crystallization, Additives

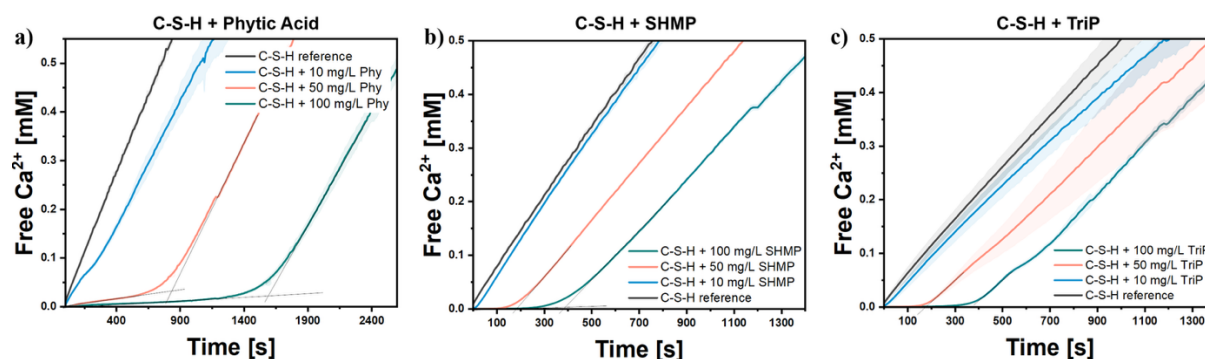

**Figure SI-1: Close-up of the  $\text{Ca}^{2+}$  binding region shown by the delay in the increase of free- $\text{Ca}^{2+}$  concentration during the precipitation titration of C-S-H in presence of a) phytic acid, b) SHMP and c) TriP in concentrations of 10, 50 and 100 mg/L.**

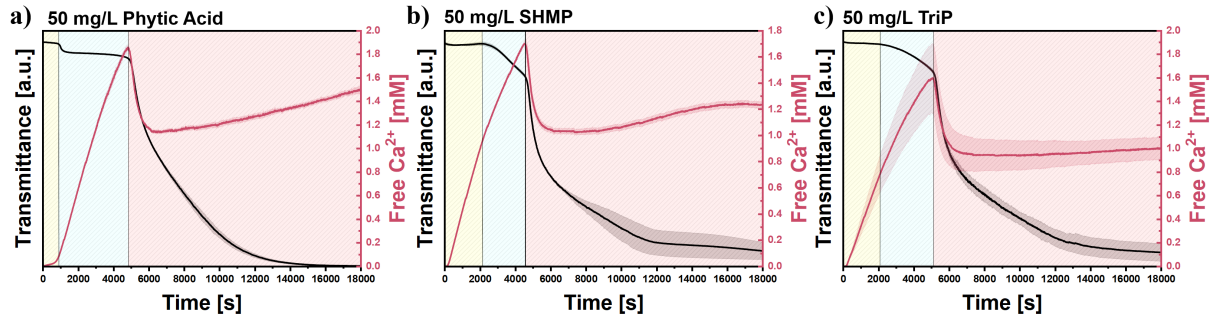

Figure SI-2: The highlighted separate regimes of the C-S-H crystallisation in presence of a) phytic acid, b) SHMP and c) TriP for the concentration of 50 mg/L, shown by the transmittance and free- $\text{Ca}^{2+}$  concentration curves.

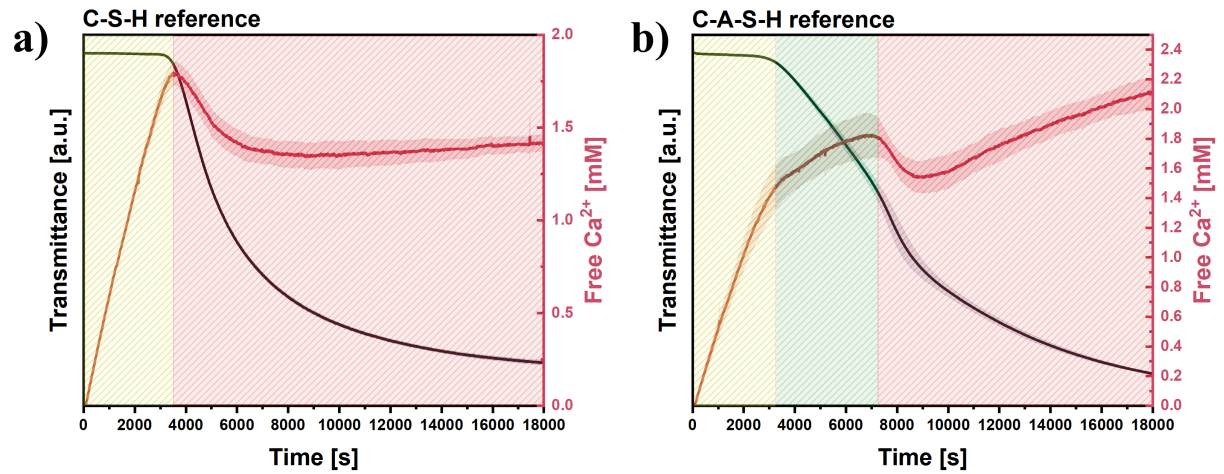

Figure SI-3: Reference plots for the pure C-S-H and C-A-S-H system with the highlighted regimes of the crystallisation.

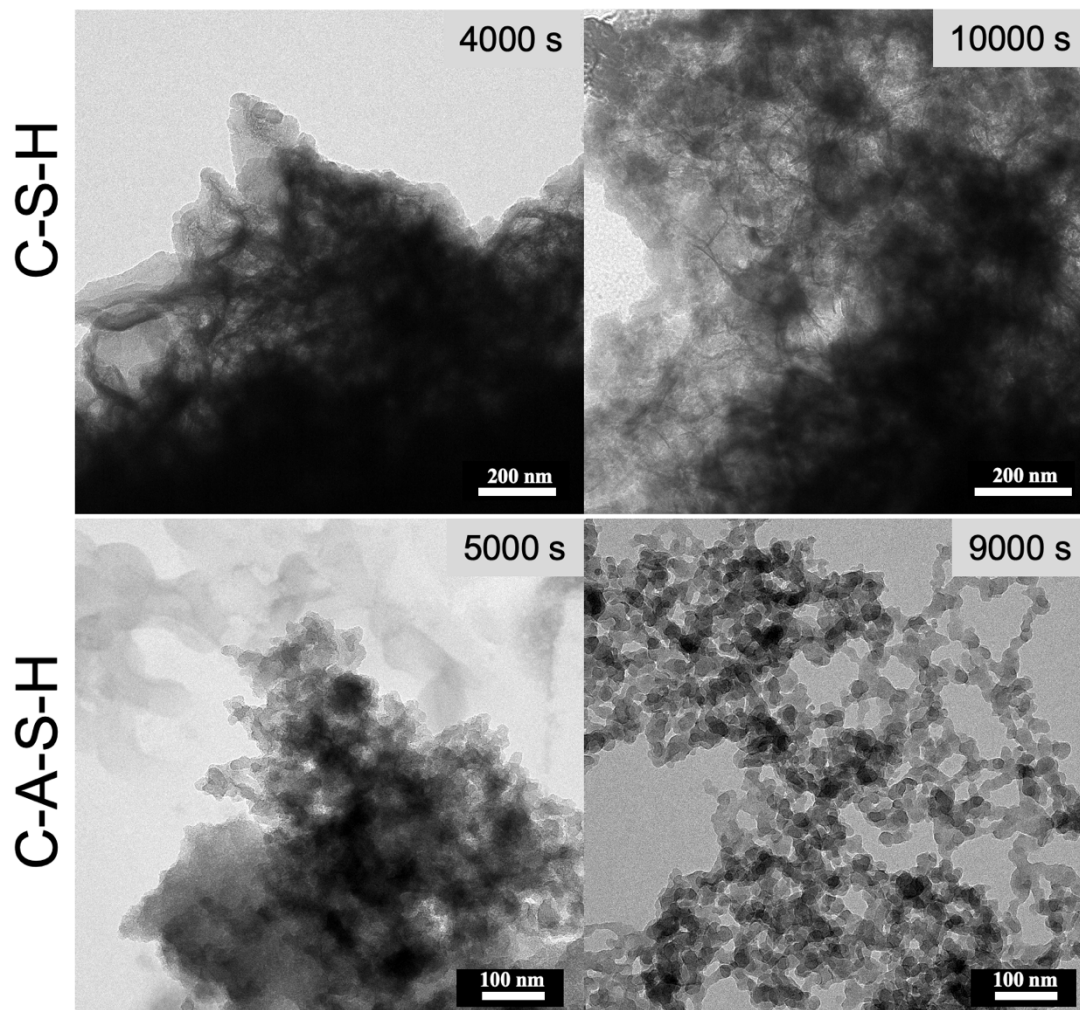

Figure SI-4: Reference TEM images of pure C-S-H and C-A-S-H aliquots at respective times shown in the images.

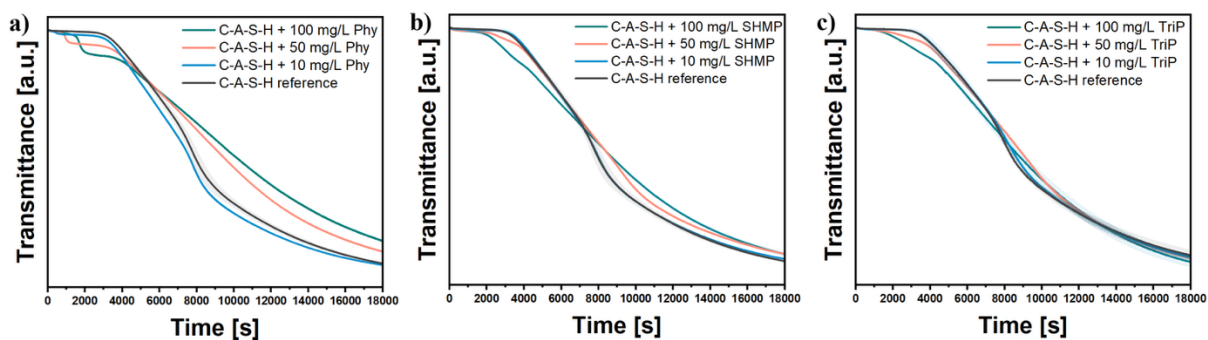

Figure SI-5: In-situ transmittance data from the precipitation titration of C-A-S-H in presence of a) phytic acid, b) SHMP and c) TriP in concentrations of 10, 50 and 100 mg/L.

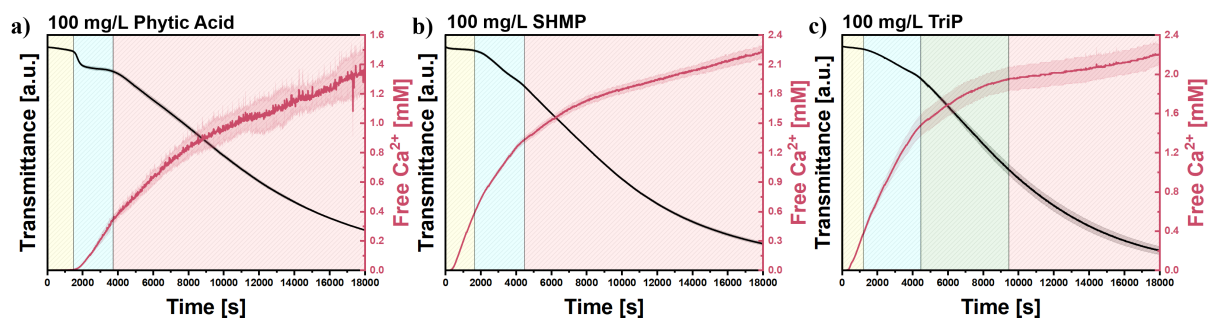

Figure SI-6: The highlighted separate regimes of the C-A-S-H crystallisation in presence of a) phytic acid, b) SHMP and c) TriP for the concentration of 100 mg/L, shown by the transmittance and free- $\text{Ca}^{2+}$  concentration curves.

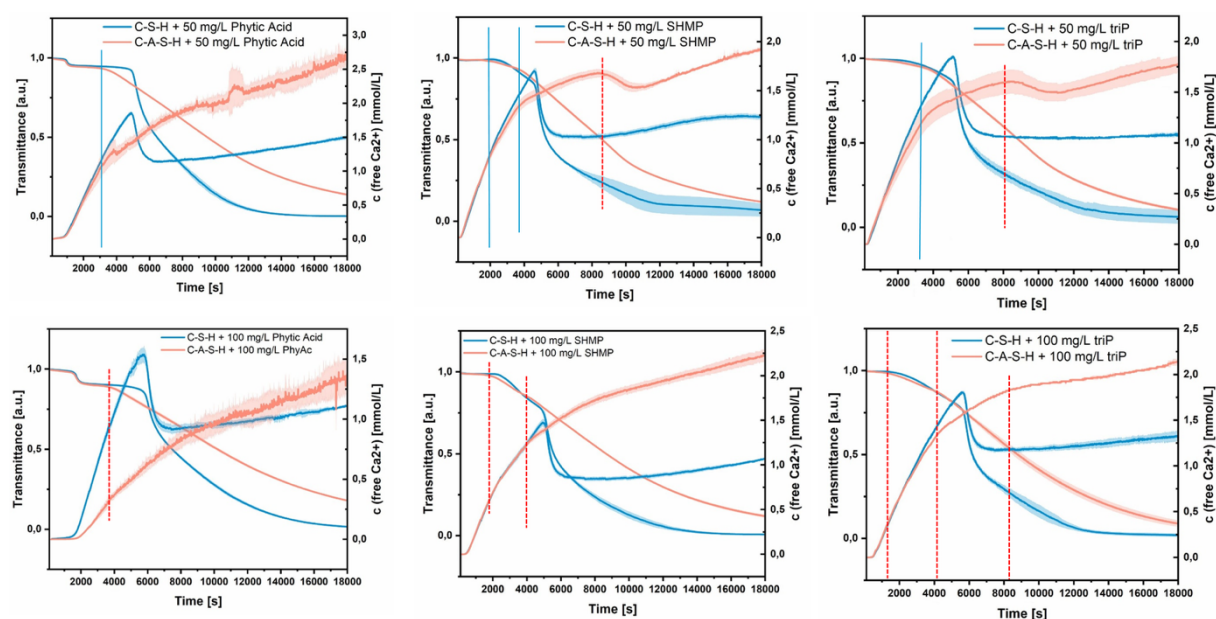

Figure SI-7: Overlapping transmittance and free- $\text{Ca}^{2+}$  concentration curves from the C-S-H (blue) and C-A-S-H (orange) precipitation titration in the presence of phytic acid, SHMP and TriP in concentrations of 50 and 100 mg/L. Highlighted are important time spots where the PoNs, specific drops in transmittance or kinks in the curves occur, each in the respective colour.



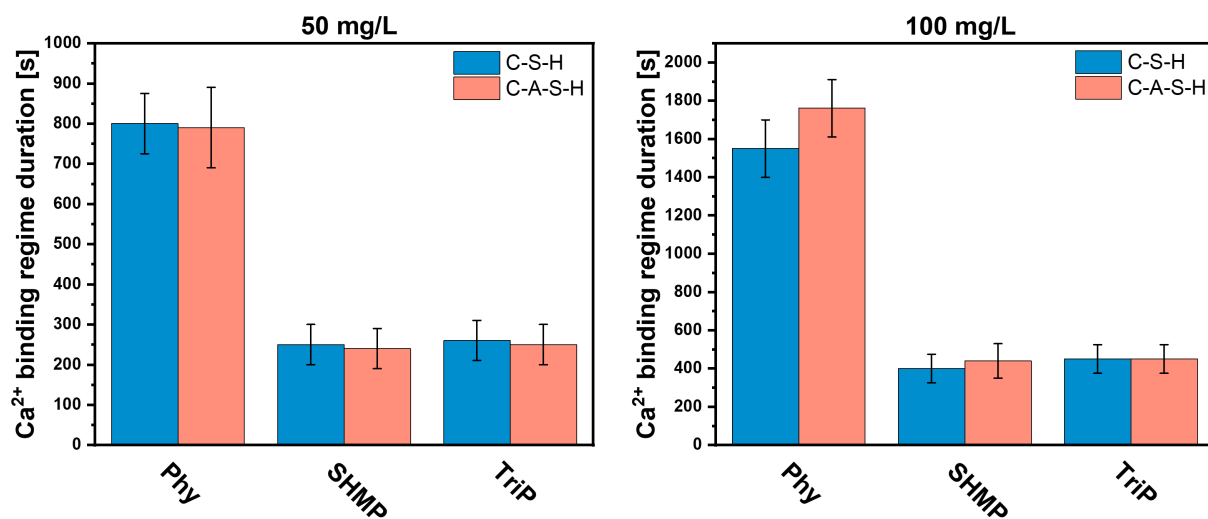

Figure SI-8: Durations of the  $\text{Ca}^{2+}$  binding regime for each additive (phytic acid, SHMP, TriP) in concentrations of 50 and 100 mg/L.

Phy

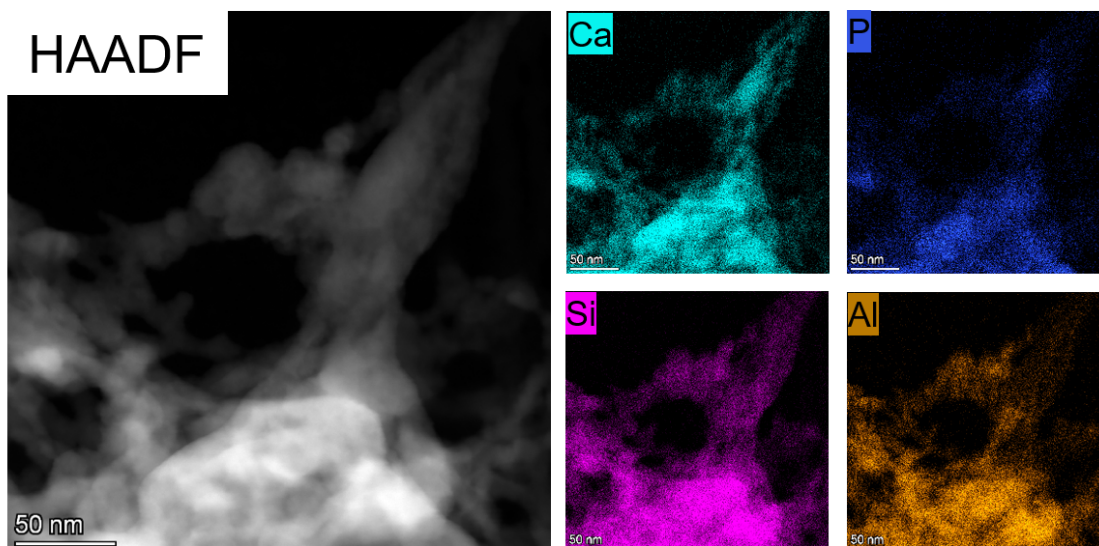

SHMP

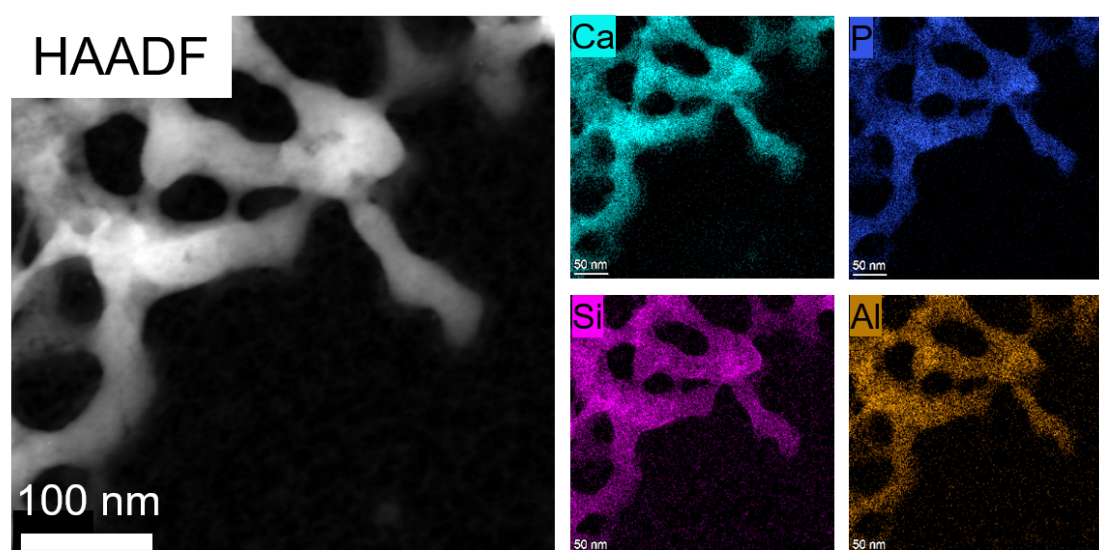

TriP

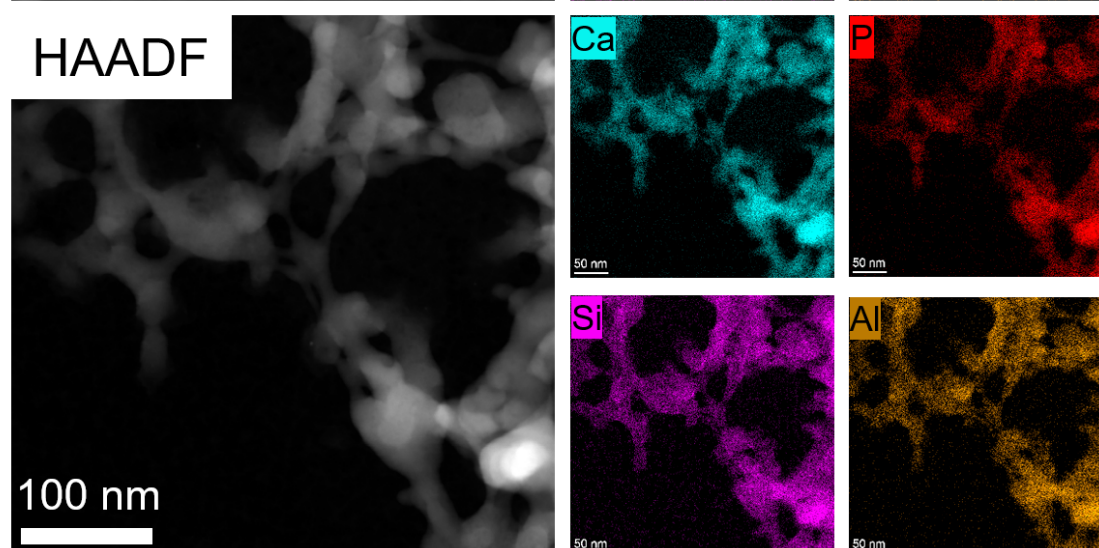

Figure SI-9: TEM images and corresponding EDX mappings for Ca, P, Si and Al of the obtained solids from the C-A-S-H aliquots after 4000 s in presence of phytic acid, SHMP and TriP at a concentration of 100 mg/L. Scale of the EDX mappings: 50 nm.

66

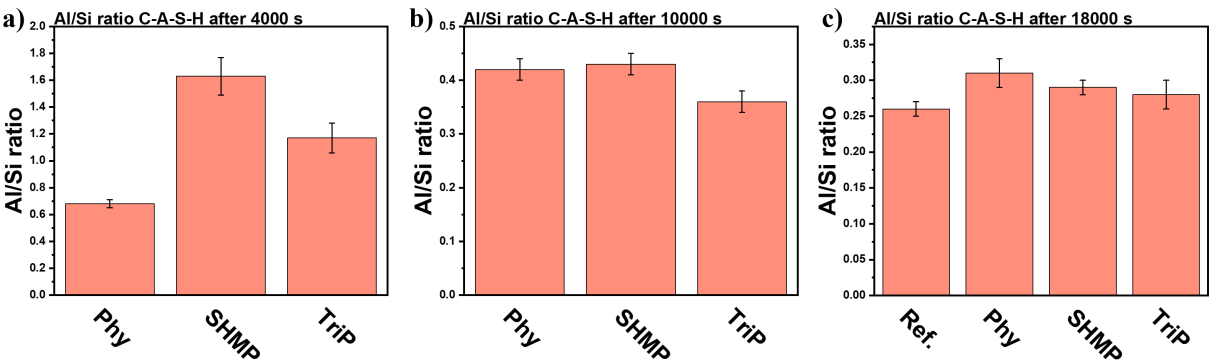

67

68

69

70

**Figure SI-10: Measured Al/Si ratios by quantitative EDX analysis of the different C-A-S-H aliquots in presence of 100 mg/L phytic acid, SHMP and TriP after a) 4000 s, b) 10000 s and c) 18000 s.**

71

72

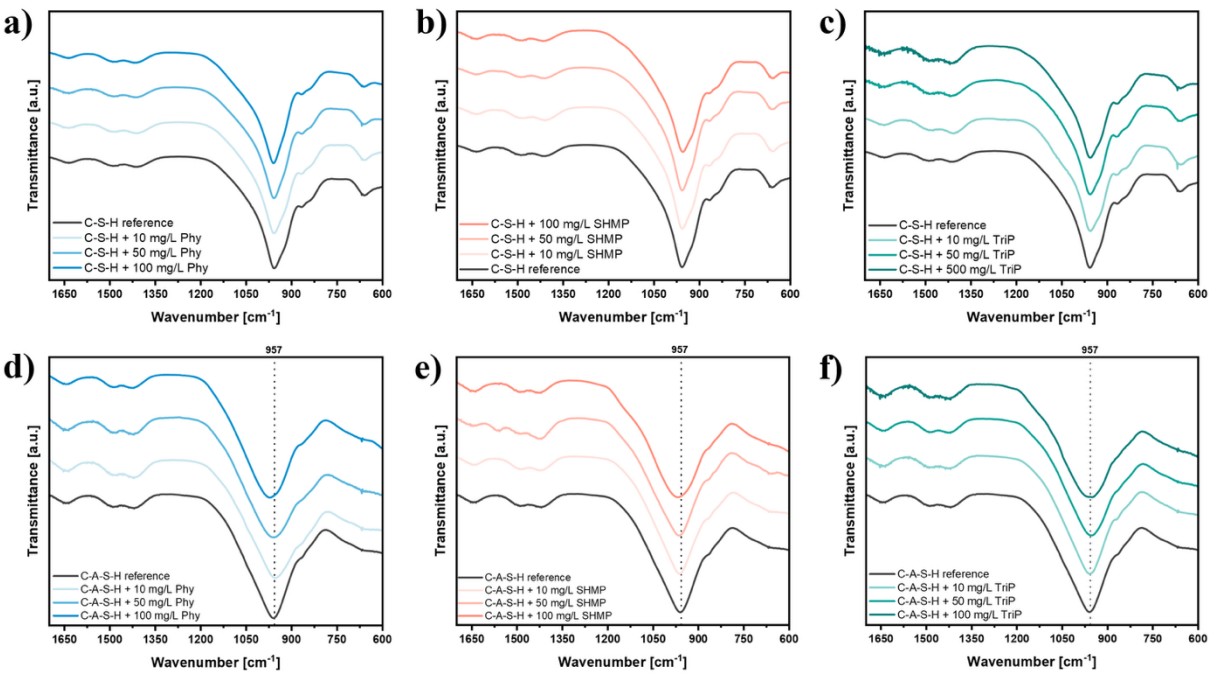

73

74

75

76

**Figure SI-11: Zoomed-in FTIR spectra of the 1700 -600 cm<sup>-1</sup> region of the obtained C-S-H (a-c) and C-A-S-H (d-f) solids from the precipitation titration experiments in presence of phytic acid (a,d), SHMP (b,e) and TriP (c,f)**

77

78

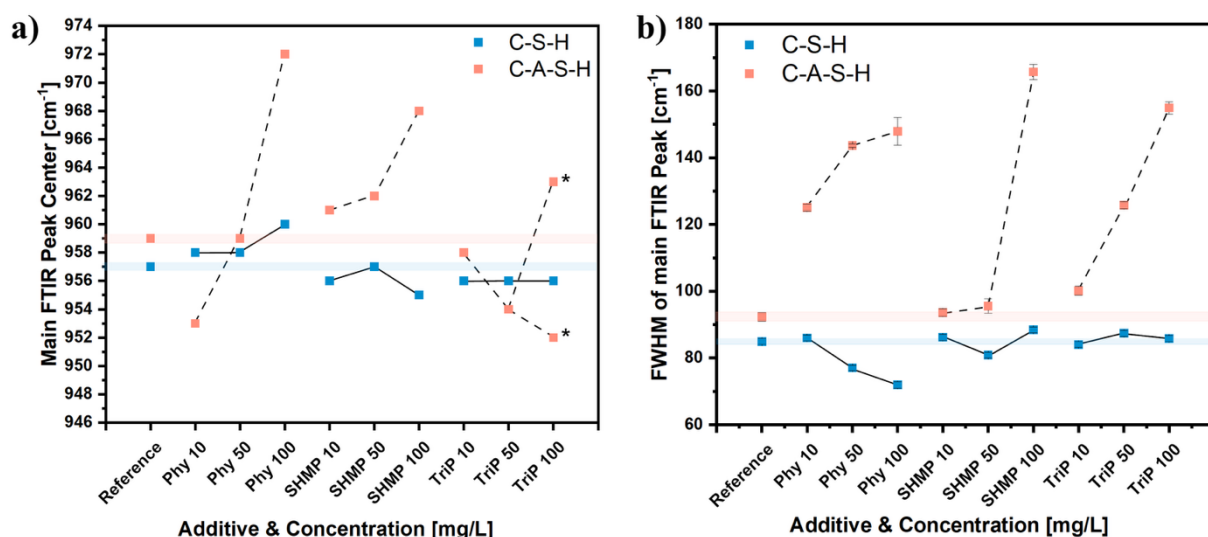

Figure SI-12: a) Location of the main FTIR peak of each experiment of all additives and concentrations (\*: Main peak is split in two) for C-S-H (blue) and C-A-S-H (orange). b) Corresponding fitted FWHM of the main peak in respective FTIR spectrum of each experiment.

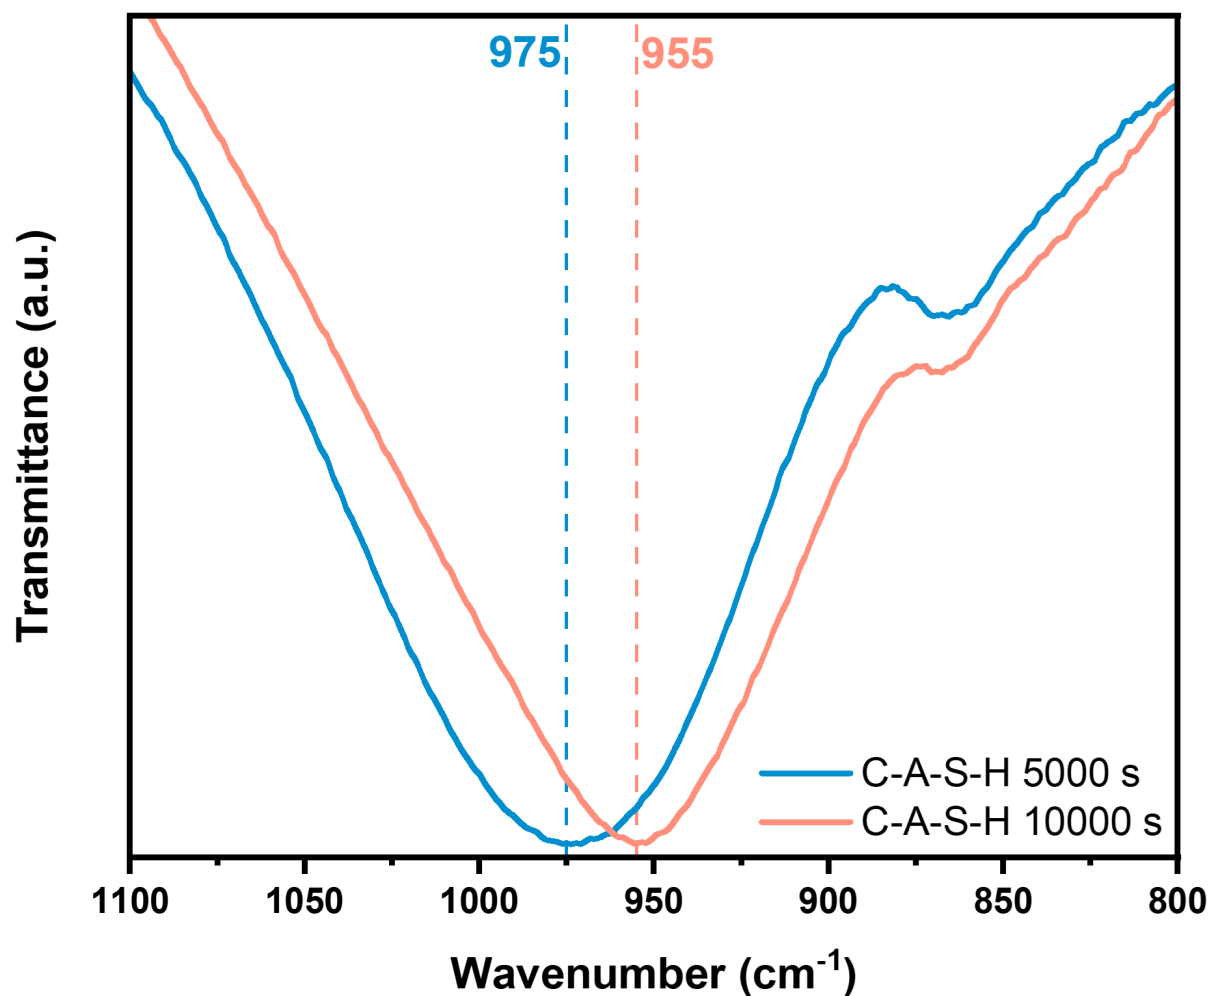

Figure SI-13: Main peak shifting in the FTIR spectrum after time for the C-A-S-H aliquots samples highlighting the higher degrees of polymerisation of early C-A-S-H species.



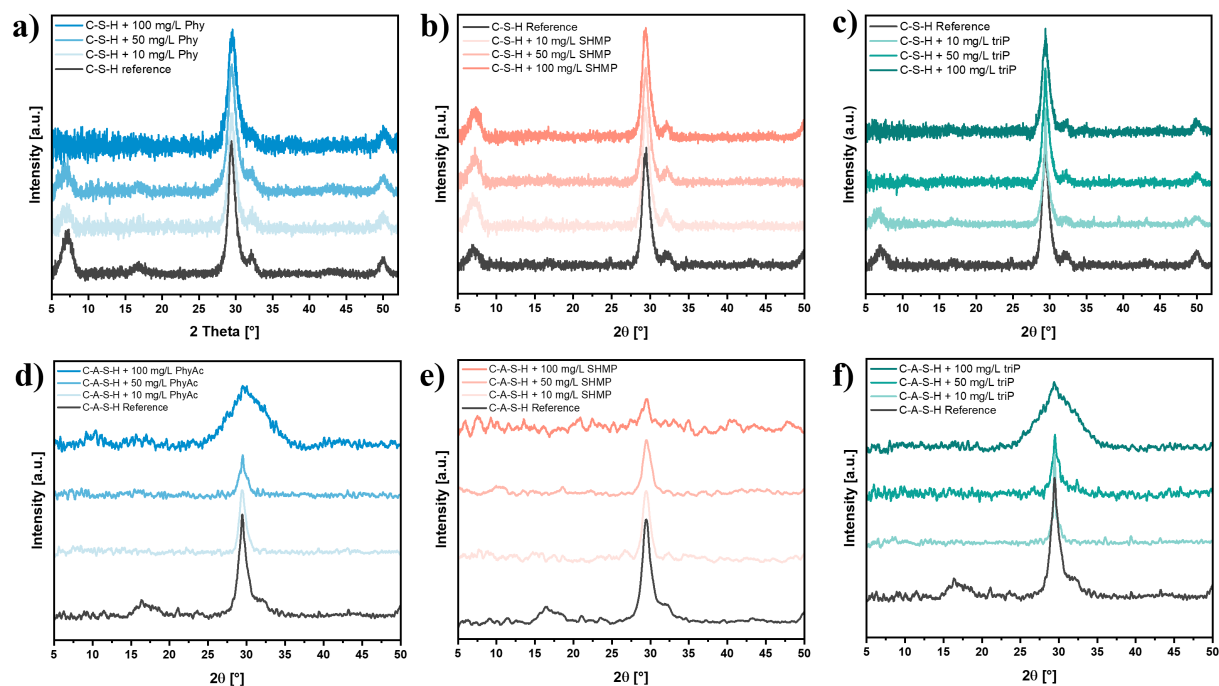

**Figure SI-14: PXRD measurements of the obtained solids from the precipitation titration synthesis of C-S-H and C-A-S-H in the presence of phytic acid, SHMP and TriP in concentrations of 0, 10, 50 and 100 mg/L.**

c(Phy)

C-S-H

C-A-S-H

0 mg/L

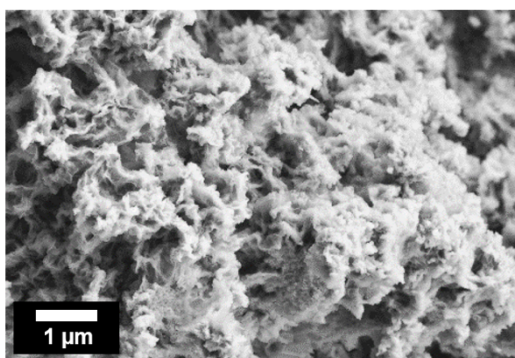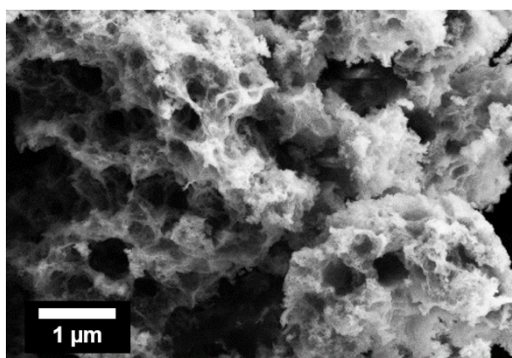

10 mg/L

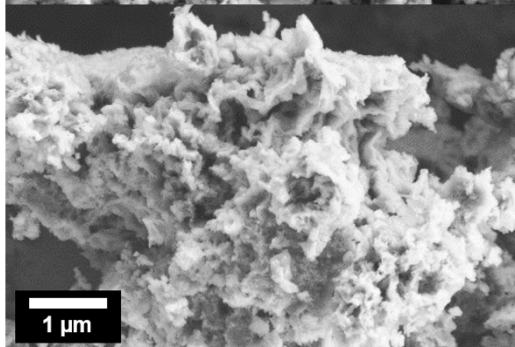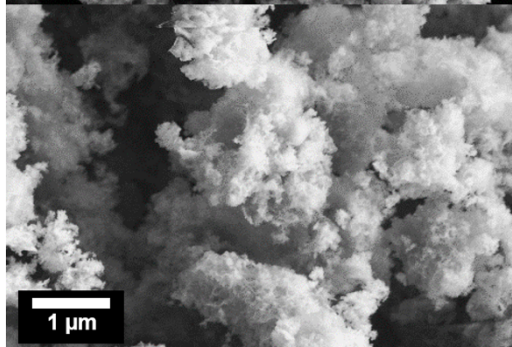

50 mg/L

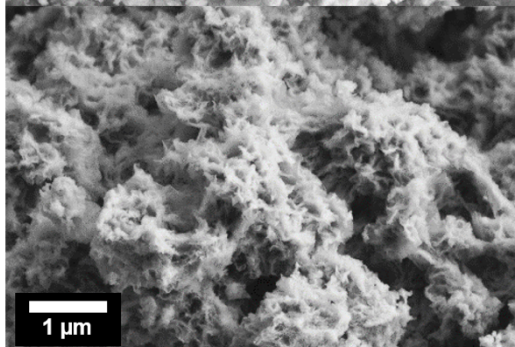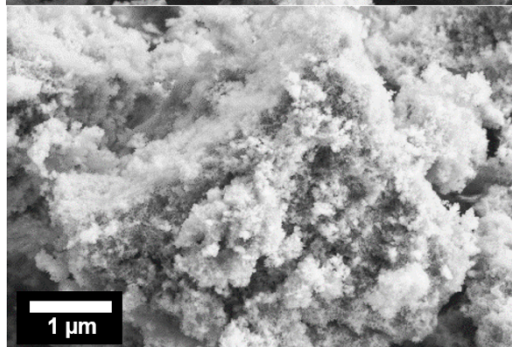

100 mg/L

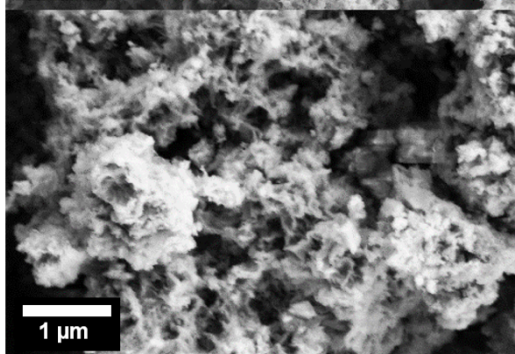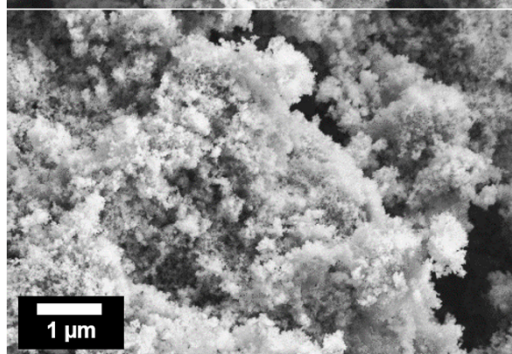

Figure SI-15: SEM images of the obtained precipitates from the C-S-H and C-A-S-H synthesis in presence of phytic acid in concentrations of 0, 10, 50 and 100 mg/L.



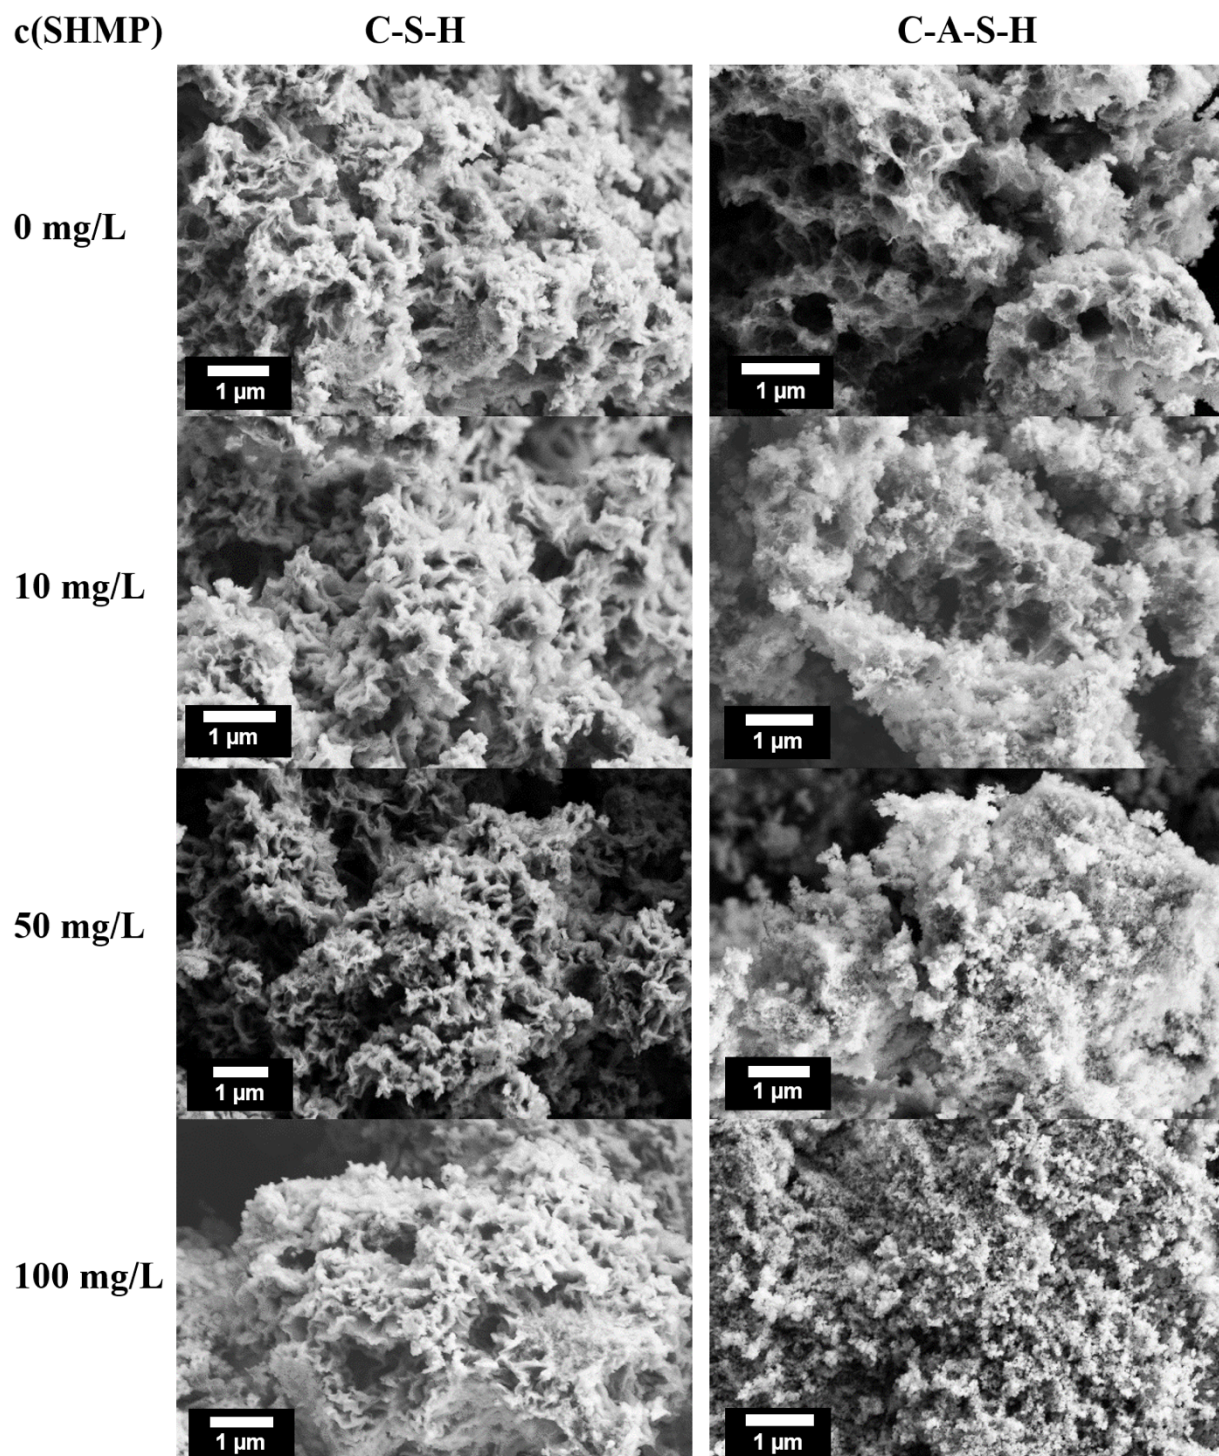

Figure SI-16: SEM images of the obtained precipitates from the C-S-H and C-A-S-H synthesis in presence of SHMP in concentrations of 0, 10, 50 and 100 mg/L.



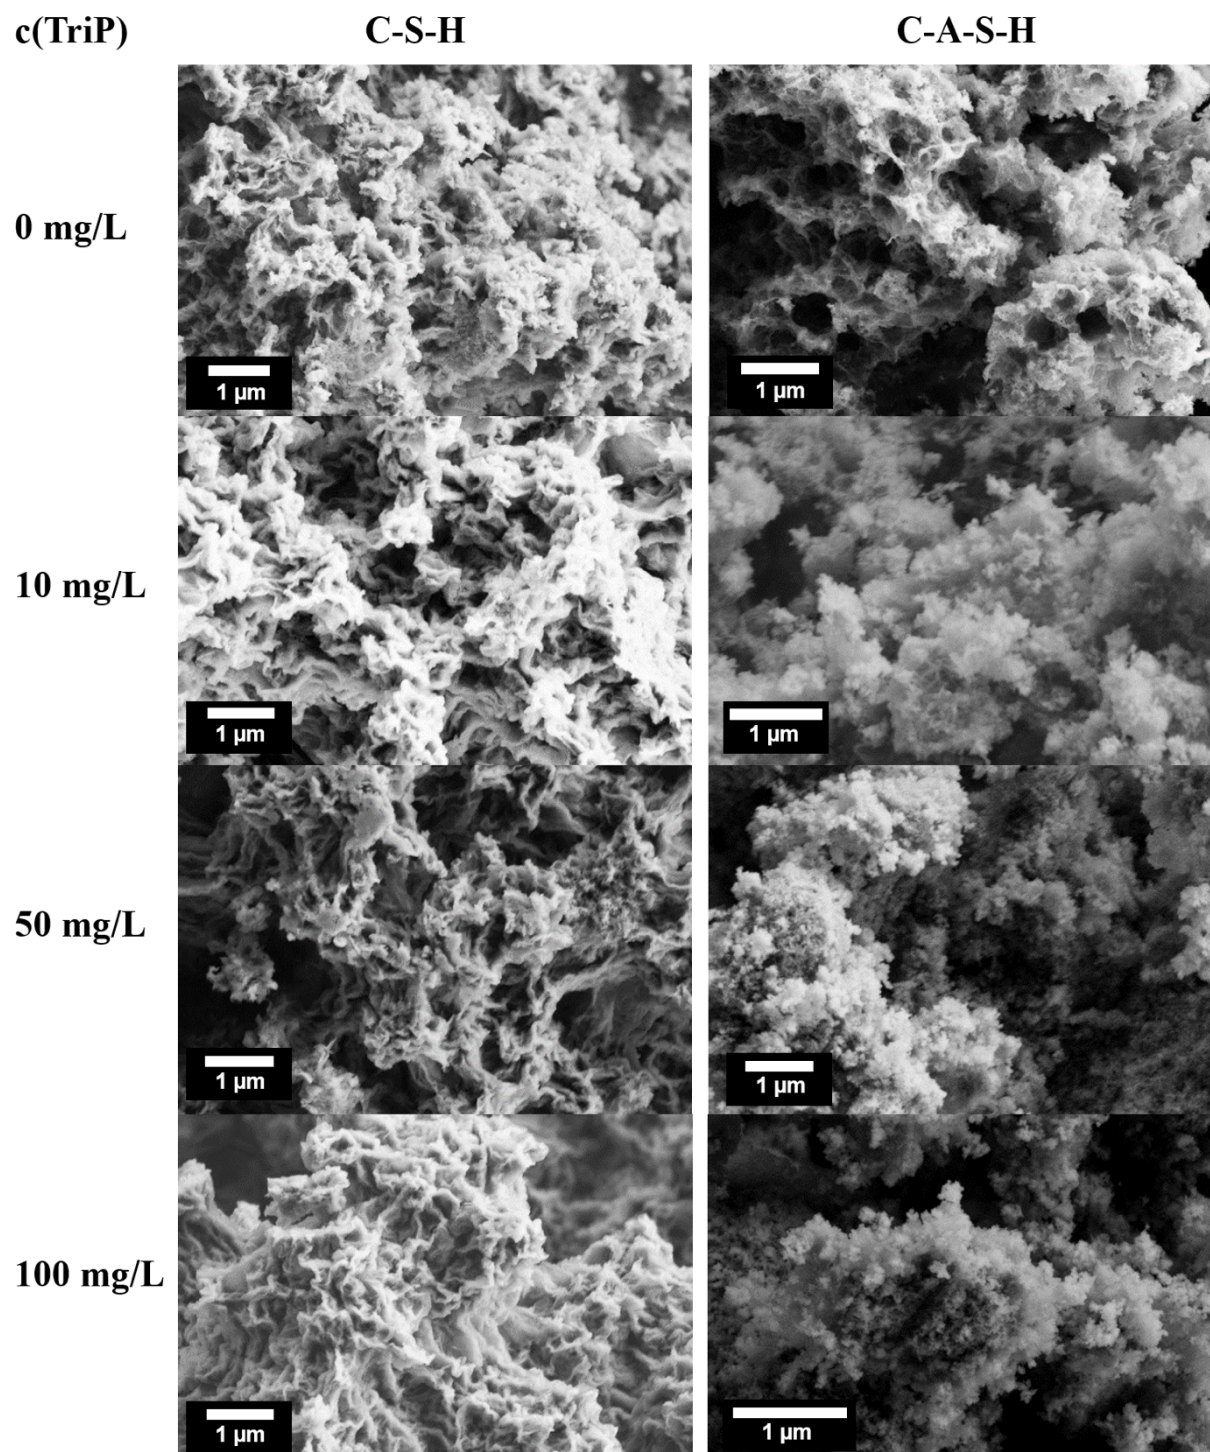

Figure SI-17: SEM images of the obtained precipitates from the C-S-H and C-A-S-H synthesis in presence of TriP in concentrations of 0, 10, 50 and 100 mg/L.
